# Supplementary material
Source: Research Square preprint supplement (doi:10.21203/rs.3.rs-9475202/v1)
Supplement: Supplementary file 2 [file e151e4f26eed3fc164114f91.docx]

# Appendix

## Appendix A – GAEN Architecture


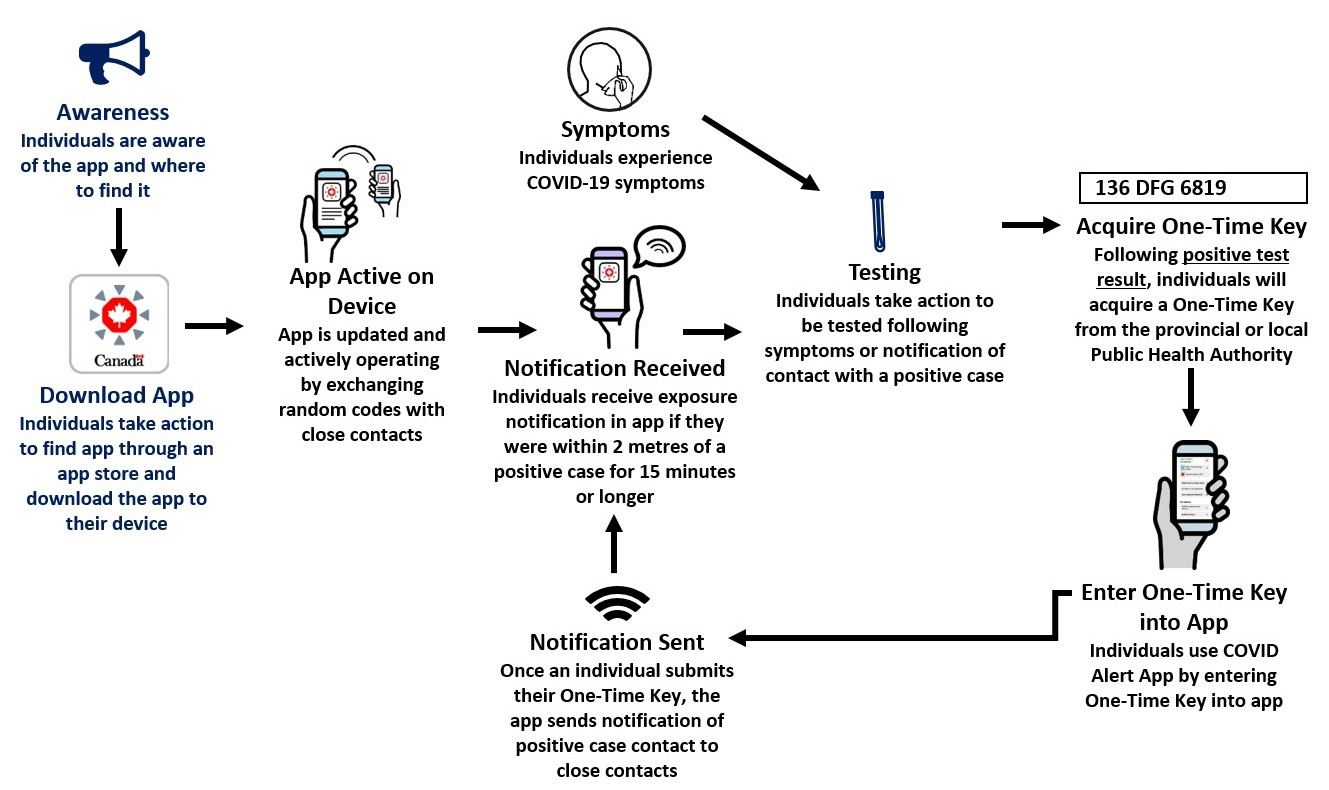


## Appendix B – Search Strategy

The following strategy outlines the search terms used for each database, as well as the number of identified publications associated with the search term, as identified in our search on May 9, 2024.

### PubMed Search Terms

(smartphone based contact trac* [tiab] OR Digital contact trac*[tiab] OR contact tracing apps [tiab] OR contact tracing application [tiab] OR "digital trac*" [tiab] OR automated contact trac* [tiab] OR digital and manual contact trac* [tiab]) OR ("exposure noti*" OR "exposure notifications "[tiab] OR GAEN OR "Google Apple Exposure Notifi*"[tiab] OR "Google Apple EN"[tiab] OR GAEN-based [tiab]OR "digital EN appli*"[tiab]) OR (bluetooth based contact trac* OR proximity awareness application OR Digital proximity trac* OR Bluetooth-enabled contact trac*) AND (COVID-19 OR "COVID-19"[Mesh] OR SARS-CoV-2 OR "SARS-CoV-2"[Mesh] OR coronavirus OR "Coronavirus"[Mesh] OR Coronaviridae OR "Coronaviridae"[Mesh] OR "Coronaviridae Infections"[Mesh] OR “coronaviridae infections” OR "Coronavirus Infections"[Mesh] OR “coronavirus infections” OR "coronavirus infections"[MeSH] OR "coronavirus disease 2019" OR "severe acute respiratory syndrome coronavirus 2" OR "2019-NCoV" OR "2019 novel coronavirus")

References = 488

### Web of Science Search Terms

(smartphone based contact trac* [tiab] OR Digital contact trac*[tiab] OR contact tracing apps [tiab] OR contact tracing application [tiab] OR "digital trac*" [tiab] OR automated contact trac* [tiab] OR digital and manual contact trac* [tiab]) OR ("exposure noti*" OR "exposure notifications "[tiab] OR GAEN OR "Google Apple Exposure Notifi*"[tiab] OR "Google Apple EN"[tiab] OR GAEN-based [tiab]OR "digital EN appli*"[tiab]) OR (bluetooth based contact trac* OR proximity awareness application OR Digital proximity trac* OR Bluetooth-enabled contact trac*) AND (COVID-19 OR "COVID-19"[Mesh] OR SARS-CoV-2 OR "SARS-CoV-2"[Mesh] OR coronavirus OR "Coronavirus"[Mesh] OR Coronaviridae OR "Coronaviridae"[Mesh] OR "Coronaviridae Infections"[Mesh] OR “coronaviridae infections” OR "Coronavirus Infections"[Mesh] OR “coronavirus infections” OR "coronavirus infections"[MeSH] OR "coronavirus disease 2019" OR "severe acute respiratory syndrome coronavirus 2" OR "2019-NCoV" OR "2019 novel coronavirus")

References = 169

### Embase Search Terms

('smartphone-based contact trac*':ti,ab OR 'digital contact trac*':ti,ab OR 'contract tracing app':ti,ab OR 'contact tracing application':ti,ab OR 'digital trac*':ti,ab OR 'automated contact trac*':ti,ab OR 'digital and manual contact trac*':ti,ab) OR (exposure noti*' OR 'exposure notifications':ti,ab OR 'GAEN' OR 'Google Apple Exposure Notifi*':ti,ab OR 'Google Apple EN':ti,ab OR 'GAEN-based':ti,ab OR 'digital EN appli*':ti,ab) OR ('bluetooth based contact trac*' OR 'proximity awareness application':ti,ab OR 'digital proximity trac*':ti,ab OR 'bluetooth-enabled contact trac*':ti,ab) AND ('covid 19'/exp OR 'covid 19' OR 'sars co v 2' OR 'coronavirus'/exp OR coronavirus OR 'coronaviridae'/exp OR coronaviridae OR 'coronaviridae infections'/exp OR 'coronaviridae infections' OR 'coronavirus infections'/exp OR 'coronavirus infections')

References = 264

### ProQuest – PAIS Index

TIAB(smartphone based contact trac* OR Digital contact trac* OR contact tracing apps OR contact tracing application OR "digital trac*" OR automated contact trac* OR digital AND manual contact trac*) OR ("exposure noti*" OR "exposure notifications"OR GAEN OR "Google Apple Exposure Notifi*" OR "Google Apple EN" OR GAEN-based OR "digital EN appli*") OR (bluetooth based contact trac* OR "proximity awareness application" OR "Digital proximity trac*" OR Bluetooth-enabled contact trac*) AND (COVID-19 OR "COVID-19" OR SARS-CoV-2 OR "SARS-CoV-2" OR coronavirus OR "Coronavirus" OR Coronaviridae OR "Coronaviridae" OR "Coronaviridae Infections" OR “coronaviridae infections” OR "Coronavirus Infections"OR “coronavirus infections” OR "coronavirus infections" OR "coronavirus disease 2019" OR "severe acute respiratory syndrome coronavirus 2" OR "2019-NCoV" OR "2019 novel coronavirus")

References = 135

## Appendix C – Data Extraction Template

| **Domain** | **Variable** | **Description** |
| --- | --- | --- |
| **Study Identification** | Study ID | Unique identifier assigned to each included study |
|  | Title | Full title of the study |
|  | DOI | Digital Object Identifier |
|  | Publication | Journal or source of publication |
|  | Date of publication | Publication date |
| **Study Context** | Country | Country where the study was conducted |
|  | US State(s) | U.S. state(s), if applicable |
|  | Date of study | Time period during which the study was conducted |
| **Exposure Notification (EN) System Characteristics** | GAEN system | Whether customized, ENX, or mixed systems |
|  | App name(s) | Name(s) of EN application(s) evaluated |
|  | Notes on EN system | Additional details about system functionality or implementation |
|  | App launch date | Date the EN app was launched |
|  | App deactivation date | Date the EN app was discontinued |
|  | Was the app still deployed during the study period? | Whether the app remained active during the study timeframe |
|  | Total adoption | Reported uptake or adoption level of the EN app |
| **Study Characteristics** | Aim of study | Stated objective(s) of the study |
|  | Study design | Study design (e.g., modeling, observational) |
|  | Type of study | Classification of study type |
|  | Notes on methods | Additional methodological details |
|  | Data source | Source(s) of data used in the study |
| **Model Characteristics** | Model used | Type of model (e.g., SEIR, agent-based) |
|  | Adoption level used for model | Assumed adoption level in modeling scenarios |
|  | Population size for model | Population size used in the model |
| **Outcomes** | Outcome | Primary outcome(s) reported |
|  | Comparator | Comparator used (if applicable) |
|  | Full epidemiological impact | Reported epidemiological impact (e.g., cases averted, transmission reduction) |
|  | Additional notes/outcomes | Additional findings or notes |
| **Bias and Funding Considerations** | Declared conflict of interest | Whether conflicts of interest were reported |
|  | Industry or independent study | Funding source or affiliation |

Table 1: Summary of included studies and reported epidemiological outcomes

| **Author/Year** | **Date of study** | **Type of Study** | **Data Source** | **Outcome** | **Comparator** | **Model Used** | **Full epidemiological impact** |
| --- | --- | --- | --- | --- | --- | --- | --- |
| Abueg 2021 | March 1, 2020, through Dec 25, 2020, plus the additional calibrated seeding period before March 1 | Mathematical Modeling | County level data; epidemiological data from Washington state and Google’s Community Mobility Reports for a time-varying infection rate | % reduction in infections and deaths per, and % increase in quarantine events by adoption level | Self-isolation due to symptoms only | OpenABM-Covid19 by Hinch et al | Case reduction: at 75%: 6–73% (K), 73–79% (P), and 67–81% (S); at 15%: 0.9–5.8%, 8.1–9.6%, and 6.3–11.8%  Death reduction: at 75%: 2–70%, 69–78%, and 63–78%; at 15%:.2–6.6%, 11.2–11.3%, and 8.2–15.0%  Quarantine events:at 15%: 4.6–6.4%, 6.6–6.8%, and 5.8–10.2%; events plateaus or decreases at high levels of adoption (60% to 70%) |
| Almagor 2020 | 2020 | Mathematical Modeling | 2011 UK census | %infections; quarantine events/testing | no app use; 0, 0.5, 1, 1.5, 3, 6, unlimited testing capacity; low app compliance of 0.5, high compliance of 0.9 | agent based model | “When symptomatic agents are prioritised for testing, as the proportion of CTA users increases, overall infections throughout the epidemic decrease, and so do infections at the peak of the epidemic, irrespective of testing capacity; some reduction in overall infections is observed as CTA adoption rates increase even in the scenario with no testing. The decrease is most substantial when testing is not limited. Moreover, for intermediate levels of CTA adoption (40–60%) and testing capacity (1.5–3%), overall infections decrease to 22–27% of the population and cases at the peak reduce by 70–85%, depending on the scenario  When the testing capacity is restricted and symptomatic agents are not prioritised for testing, an increase in the proportion of CTA users does not always lead to a decrease in infections. This is observed for all testing capacities between 0 and 6%. In the case of a 3% testing capacity, CTA adoption rates of 40–80% result in substantially more infections than the scenario with no CTA users, both for high and low compliance with the CTA because of inefficient testing policy.   In a scenario with 1% testing and 80% CTA users, overall infections reach 23% when compliance is high and 27% when compliance is low. the peak of the epidemic compared to the baseline scenario is reduced by ~ 80% when compliance is high and ~by 74% when  compliance is low” |
| Aronoff-Spencer 2023 | Dec 15, 2020 to Jan 9, 202 | Mathematical Modeling | Anonymous aggregate state level code usage data (described below), and state and county level exposure notification web traffic statistics from CDPH | EN-based prediction model to short term forecast COVID-19 reported cases in California | omnibus measures of the performance of a model including EN data to a case-only mode; | Bayesian predictive model | Near past EN is related to near future case counts and that its inclusion can improve the forecasting accuracy of case counts 1 to 6 or more days into the future |
| Aronoff-Spencer 2022 | December 10, 2020, to July 1, 2021 | Mathematical Modeling | activity data generated by CA  Notify; aggregated data and reported as KPI | KPIs | Assumed that the secondary attack rate, level of quarantine adherence, and transmission dynamics, as well as other background interventions, policies, and protective behaviors, in California are similar to those in the UK | Wymant et al | cases averted: >31 000 cases  Deaths averted: > 600 deaths |
| Ballouz 2021 | August 07, 2020 and September 30, 2020 | Other: Cohort study | REDCap of cases and close contacts ≥18 years old, residing in the Canton of Zurich, and had sufficient knowledge of the German language | "primary outcomes included the frequency of cases who received and uploaded the CovidCode, frequency of close contacts who received a SwissCovid app notification and among those, and the frequency of close contacts who received the notification before being contacted by MCT. Regarding effectiveness, primary outcome was the time interval (in days) between exposure date and the beginning of quarantine among close contacts, comparing those notified by the app to those not notified by the app" | individuals notified only by manual contact tracing (MCT) | N/A | app-notified contacts entering quarantine on average 1 day earlier than those not notified by the app "Ferretti et al. demonstrated in a modeling study that reducing the time to quarantine from 3 to 2 days had a substantial impact on reducing the spread of SARS-CoV-2, assuming that a large fraction of the population is using the app." |
| Burdinski 2022 | 2022 | Mathematical Modeling |  |  |  | stochastic epidemic network model that combines the mechanistic aspects of DCT with the disease-dynamical components | “DCT indeed prevents cases, even if this number is in the single-digit percentages; DCT can have a benefit other than slowing down the spread of the disease, potentially reducing the harm of mortality due to earlier medical treatment of an infected person. Also, our analysis suggests that efficacy can be enhanced by increasing participation rates, clustering of app usage, randomized or symptom-based testing, the proportion of test results uploaded to the app, the proportion of contacted people that trigger next-generation tracing, as well as the introduction of strict NPIs that strongly suppress growth after an outbreak emerge.” |
| Ellmann 2022 | 1 April 2022 | Mathematical Modeling | The cumulative download numbers of the CWA are published as a time series by the German Robert Koch Institut (RKI) | reduction in R, cases, hospitalizations, and deaths | None use of CWA | Mathematical and statistical modeling | “R-value reduction up to 5.4% (95% CI: 5.3-5.6%; minimum reduction 1 July 2020 at 0.0054; 95% CI: 0.0053–0.0056; from the second half of 2021, increase in absolute reductions in R-value was followed by a maximum of 0.058 (95% CI: 0.057–0.060) in early March 2022  By 1 April 2022, the CWA had prevented 1.41 million cases (95% CI: 1.38–1.48 million); "It is noticeable that the cumulative reduction in the number of cases stagnated well below 200,000 cases over a long period of time, and, for example, one year after the release of the CWA, there were only 101,000 cases (95% CI: 93,000–107,000; as of 1 July 2021). A massive increase did not begin until the winter of 2021, coinciding with the dynamics of the delta/omicron waves and the steady increase in adoption rates to that point."  The reductions in infection cases due to the CWA were also reflected in reductions in hospitalizations, intensive care treatments, and deaths. As of 1 April 2022, the CWA had avoided 17,200 hospitalizations (95% CI: 16,600–18,100), 7200 deaths (95% CI: 6900–7400), and 4600 intensive care treatments (95% CI: 4400–4900); By this time, the CWA had reduced infection cases by 6.1% (95% CI: 5.8–6.2%), hospitalizations by 4.6% (95% CI: 4.3–4.7%), intensive care treatments by 4.1% (95% CI: 3.8–4.1%), and deaths by 5.6% (95% CI: 5.3–5.7%).” |
| Esposito 2021 | First 100 days of pandemic | Mathematical Modeling |  | # of death and hospitalization reduction; increase in quarantined people | No DDEIS use | a deterministic compartment model based on the well-known SEIR (Susceptible–Exposed–Infectious–Recovered) model; a novel set of dynamic equations were elaborated to mimic the flux of people among a set of compartments that represents the variety of scenarios according to the DDEIS proposed | “a remarkable reduction of exposed individuals and the increase of quarantined people due to the implementation of the Early Detection strategy; The fraction of deceased people with respect to the total number of individuals is 0.5% (compared to 2.1% with no DDEI scenario); within 100 days, # of deceased goes from approx 2,000 (no DDEIS) to approx 500; reduction in # of hospitalizations (at day 20, non-DDEis is approx 10k compared to approx 2.5k” |
| Geenen 2023 | 18 October 2021 - 9 January 2022 | Observational |  |  |  |  | “MCT detected over 10 times the number of infected contacts found through DPT alone, although in a combined strategy, DPT could identify 5.2% of additional cases not found through MCT.” |
| Hernández-Orallo 2022 | simulation between Sept and Dec 2020 | Mathematical Modeling |  | effectiveness of digital contact tracing | non-use of app | based on the basic SIR model, also considering quarantine, isolation measures, and incubation periods | “approx. 0.59 million infected cases and 5900 deaths were averted; it is far from controlling the epidemic. Satisfying this condition would require an adoption ratio greater than 80% with a true positive ratio of 0.8, clearly an unrealistic goal. Considering the application of mild measures that could reduce the value of Re to values around 1.5, the utilisation required should have been 65%, which is the value determined by the first models” |
| Jeon 2023 | November 8, 2020–January 2, 2021 | Observational | Pennsylvania Department of Health; daily number of COVID-19 cases pulled CDC COVID Data Tracker | cases and hospitalizations averted over an 8-week period | non-use of DCT; MCT only | CDC’s COVIDTracer modeling tool | “estimated that digital notifications averted 2–16 additional cases (7–69 cases/1,000 notifications) and <1 hospitalization; In comparison, we estimated standard CICT averted 10,168–17,151 cases and 250–421 hospitalizations during the same period.” |
| Kendall 2023 | 24 September 2020 - 24 September 2021 | Observational | The UK Health Security Agency (UKHSA), publicly available data | estimated cases, hospitalisations and deaths averted | counterfactual scenario where the app is not present but all other interventions and behaviours remain unchange | modelling approach of Wymant & Ferretti | app’s contact tracing function averted 1 million cases (sensitivity analysis 450,000–1,400,000), corresponding to 44,000 hospital cases (SA 20,000–60,000) and 9600 deaths (SA 4,600–13,000) over the course of its first year |
| Kinyili 2022 | 1st of May 2020 and 21st of June 2020 | Mathematical Modeling | the government of the Republic of South Africa | the impact(s) of the use of the COVID Alert SA app | testing exposed individuals not using the app (assumed perfect testing) | modified SEIR deterministic model | “The increased implementation of the use of the COVID Alert SA app by the general public in presence of testing, would greatly diminish the basic reproduction number and thus the disease free equilibrium hence eradicating the epidemic over relatively shorter time  If the use of the COVID Alert SA app by the general public, would increasingly be implemented concurrently with testing for the COVID-19, then this would remarkably diminish the basic reproduction number. This would lead to the DFE becoming stable and consequentially getting rid of the COVID-19 pandemic over relatively shorter time  implementing at least 30% usage of the app simultaneously alongside gradually increasing measure of test for individuals not using the app would be sufficient to stabilize the DFE  As the measure of the use of the app assumes its extreme value, the plateau number of cumulative infections declines (the more people that use the app, the lower the number of infections/the wider the distribution of infections)” |
| Leung 2024 | December 2020 - 31 March 2021 | Mathematical Modeling | Epidemiological data from three sur­ veillance systems were used: -Osiris: the national case notification registry containing all  confirmed COVID-19 cases (Ward et al., 2005)  – CoronIT: tests carried out by the Municipal Health Services, from all  public testing facilities  – HPZone: all contact tracing data   Behavioural data from three large studies were used:  – CGU: questionnaires about beliefs and adherence to measures, ran by  the Corona Behavioural Unit of the RIVM (RIVM, 2021)  – LISS: questionnaires about the tracing app, beliefs and adherence to  measures, with an existing longitudinal Social Sciences cohort panel  (Van der Laan, 2021) -PanelClix: questionnaire about the tracing app and how it is used,  with an existing internet panel ( | reduction in the reproduction number, R | with contact tracing compared to the reference reproduction number without testing and tracing | a simulation model for SARS-CoV-2 transmission and contact tracing | The baseline parameter set resulted in a total reduction of the reproduction number R by only 0.3 % with contact tracing apps  The contribution of app-based tracing remained limited in all sensitivity analyses: 0.2–0.5 % reduction in R  In the extreme case that 80 % of the population would use the contact tracing app, the app could contribute 14.1 % of the reduction in R |
| Nakamoto 2020 | August 2020 | Mathematical Modeling | National Institute of Infectious Diseases in Japan | adoption rate to reduce R <1 | the model evaluates scenarios in which the epidemic is established and countermeasures such as contact tracing are employed to control the spread of COVID-19; it can be observed how the trend of the effective reproduction number (Rt) and thus of the outbreak would dynamically change. | Kurita et al. simulation model | “that when the participation rate increases starting from zero, the effective reproduction number decreases gradually from a value >1; however, to meaningfully contain the spread of COVID-19 (ie, Rt<1), approximately 90% participation of the population would be required” |
| Segal 2022 | November 30, 2020– March 31, 2021 | Observational | iOS EN Setting and Activations and Android Downloads; APHL EN Verification Server; EN Private Analytics; WA State DOH; User survey | cases averted | non-use | Wymant et al | 5500 infections prevented during the first 4 months; Range of SAR used in cases averted modeling include 5.1%–13.7% during the first 4 months of WA Notify |
| Streilein 2022 | NA | Mathematical Modeling | we calibrated the default probability values for interaction based on documented EN experiences from the United Kingdom and  Switzerland and from consultations with subject matter experts; derived the initial active case count from COVID-19 US surveillance in early 2021 | R reduction | 0% adoption with manual contact tracing in place | Simulated Automated Exposure Notification (SimAEN) | “(scenarios)  scenario 1: tct identified 2.7% of the total number of infected persons; EN identi- fied an additional 1.3% and 2.1% of infected persons through narrow and wide nets, respectively. scenario 2: tct identified 3.2% of the total number of infected persons; EN identified an additional 1.5% and 1.9% of infected persons through narrow and wide nets, respectively; regardless of the decreased specificity of the wide net, the effective reproductive number, RE, was minimally affected (a decrease <0.03 when changing from narrow to wide settings);   (different adoption rates) The total number of cases decreased with higher EN adoption rates, which resulted in a lower RE and in the overall reduction of cases identified by EN and traditional contact  tracing. EN adoption at 25% had a modest effect on reducing case counts (R values in scenario one: 1.46, 1.41, 1.38, 1.24)(R values in scenario 2: 1.03; 1.01; 0.93; 0.90). In scenario 2, as EN adoption increased to 75%, the cases trended downward, with RE reaching 0.90;  SimAEN modeling confirmed that EN effectiveness depends on several factors, including EN detector settings and degree of EN adoption. The more sensitive (wider) the detector setting, the more cases were identified via EN; however, the number of persons unnecessarily instructed to quarantine also increased” |
| Sun 2022 | February 25, 2021 to July 27, 2021 | Other: comparative assessment | Canadian Digital Service | number of cases averted | non-use of app | Wymant et al | Cases Averted: At 45% quarantine effectiveness:  5% SAR: 6,284; 6% SAR: 7,542 At 65% quarantine effectiveness:  5% SAR: 9,077; 6% SAR: 10,894  Deaths Averted: At 45% quarantine effectiveness:  5% SAR: 57; 6% SAR: 69 At 65% quarantine effectiveness:  5% SAR: 83; 6% SAR: 101  03/03/2021 and 15/07/2021: Cases averted: 382,215 ratio of cases averted to cases: 0.016 -0.029 ratio of deaths averted to deaths: 0.016-0.029 (Lower bound: 5% SAR and 45% quarantine effectiveness; Upper bound: 6% SAR and 65%  quarantine effectiveness.)  Canada total: estimated cases averted (% of total cases): 6,284 -10, 894 (0.47-0.81%) estimated deaths averted (% of total cases): 57-101 (0.004 - 0.01%)  the proportion of app users is positively associated with the ratio of cases  averted to cases, which supports the positive intervention effects of COVID Alert on reducing the burden of the disease  “Nationally, the COVID Alert app had limited impact. Because the app was not widely adopted in some of the more populated provinces, its overall impact was quite limited, preventing only 1.6-2.9% of cases and deaths during the study period” |
| Wymant 2021 | 24 September 2020 to the end of December 2020 | Observational | The COVID-19 case numbers per day we used here are those reported at https://coronavirus.data.gov.uk/, | number of cases averted | non-use of the app | two approaches: mechanistically modelling the app’s function, and a statistical approach | the fraction of cases averted (among all cases observed or averted) increased by 0.8% for 1% increase in app uptake   Cases and deaths averted Cases: 284,000 (108,000–450,000) (from modeling of digital tracing); 594,000 (317,000–914,000) (From matched-neighbours regression ) Deaths: 4,200 (1,600–6,600) (from modeling of digital tracing); 8,700 (4,700–13,500)(From matched-neighbours regression )  For comparison, the total number of cases and deaths that actually occurred in this  period were 1,892,000 and 32,500, respectively.   "30% app uptake was estimated to avert approximately 1 infection for every 4 infections that arose during 4.5 months"; We estimated that for every percentage point increase in app uptake, the number of cases could be reduced by 0.8% (using modelling) or 2.3% (using statistical analysis)." |
